# Supplementary material for: Characterization of a Functional Role of the Bradyrhizobium japonicum Isocitrate Lyase in Desiccation Tolerance
Source: Int J Mol Sci. 2015 Jul 22;16(7):16695–709. doi: 10.3390/ijms160716695 (PMC4519974; doi:10.3390/ijms160716695)
Supplement: Supplementary file 1 [file ijms-16-16695-s001.pdf]

## Supplementary Information

**Table S1.** Functional classification of genes differentially expressed in desiccation stress (RH 27 %, USDA110 vs. WC2455). The cut-off threshold was 1.5-fold with q value less than 5%. Positive values in fold change indicate up-regulation while negative values indicate down-regulation. Functional levels were adopted from the rhizobase (<http://genome.kazusa.or.jp/rhizobase/Bradyrhizobium/genes/category>).

| Locus ID | Fold Change | q-Value (%) | Functional Level I                                         | Functional Level II                       | Functional Level III (Description)                    |
|----------|-------------|-------------|------------------------------------------------------------|-------------------------------------------|-------------------------------------------------------|
| bll7086  | +1.5        | 0.00        | Biosynthesis of cofactors, prosthetic groups, and carriers | Cobalamin, heme, phycobilin and porphyrin | anaerobic coproporphyrinogen III oxidase              |
| blr4700  | +1.7        | 0.00        | Cell envelope                                              | Membranes, lipoproteins and porins        | putative outer-membrane immunogenic protein precursor |
| blr5625  | +2.5        | 0.00        | Cellular processes                                         | Chaperones                                | 10 KD chaperonin                                      |
| bll5219  | +2.1        | 0.45        | Cellular processes                                         | Chaperones                                | small heat shock protein                              |
| blr5626  | +2.1        | 0.00        | Cellular processes                                         | Chaperones                                | 60 KDA chaperonin                                     |
| bll6865  | +1.9        | 0.45        | Cellular processes                                         | Chemotaxis                                | flagellin                                             |
| blr7740  | +1.9        | 0.00        | Cellular processes                                         | Chaperones                                | small heat shock protein                              |
| bll7146  | +1.7        | 0.45        | Cellular processes                                         | Cell division                             | metalloprotease                                       |
| bsl3986  | +1.7        | 0.45        | Cellular processes                                         | Chaperones                                | cold shock protein                                    |
| blr4653  | +1.7        | 0.00        | Cellular processes                                         | Chaperones                                | molecular chaperone DnaJ family                       |
| blr4637  | +1.6        | 0.00        | Cellular processes                                         | Chaperones                                | probable HspC2 heat shock protein                     |
| bll3872  | +1.6        | 0.00        | Cellular processes                                         | Protein and peptide secretion             | HlyD family secretion protein                         |
| blr4635  | +1.5        | 0.00        | Cellular processes                                         | Chaperones                                | chaperonin GroEL                                      |
| blr2767  | +1.6        | 0.45        | Central intermediary metabolism                            | Nitrogen fixation                         | iron-sulfur cluster-binding protein                   |
| blr2764  | +1.6        | 0.00        | Central intermediary metabolism                            | Nitrogen fixation                         | cytochrome-c oxidase                                  |
| bll0823  | +1.7        | 0.00        | DNA replication, recombination, and repair                 | -                                         | DNA gyrase subunit B                                  |
| bll3998  | +2.3        | 0.00        | Energy metabolism                                          | Amino acids and amines                    | probable succinate-semialdehyde dehydrogenase [NADP+] |
| blr7040  | +2.1        | 0.00        | Energy metabolism                                          | Respiration                               | cytochrome C-type protein                             |
| blr1656  | +2.0        | 0.00        | Energy metabolism                                          | Sugars                                    | putative glycosyl hydrolase                           |
| bll4784  | +1.8        | 0.45        | Energy metabolism                                          | Pyruvate and acetyl-CoA metabolism        | aldehyde dehydrogenase                                |

Table S1. *Cont.*

| Locus ID | Fold Change | q-Value (%) | Functional Level I                             | Functional Level II          | Functional Level III (Description)    |
|----------|-------------|-------------|------------------------------------------------|------------------------------|---------------------------------------|
| blr4657  | +1.6        | 0.45        | Energy metabolism                              | Sugars                       | beta-glucosidase                      |
| blr6128  | +1.5        | 0.00        | Energy metabolism                              | Respiration                  | cytochrome c552                       |
| blr2455  | -2.7        | 0.5         | Energy metabolism                              | TCA cycle                    | isocitrate lyase                      |
| bll1200  | +1.8        | 0.00        | Fatty acid, phospholipid and sterol metabolism | -                            | 5-aminolevulinic acid synthase        |
| blr1812  | +2.4        | 0.00        | Other categories                               | Symbiosis                    | nodulation protein                    |
| bll8199  | +2.0        | 0.00        | Other categories                               | Transposon-related functions | putative transposase                  |
| bll4642  | +1.9        | 0.00        | Other categories                               | Transposon-related functions | putative transposase                  |
| bll7981  | +1.7        | 0.00        | Other categories                               | Other                        | putative dehydrogenase                |
| bll2019  | +1.7        | 0.00        | Other categories                               | Symbiosis                    | transcriptional regulatory protein    |
| bll5655  | +1.6        | 0.00        | Other categories                               | Other                        | alcohol dehydrogenase                 |
| bll4232  | +1.5        | 0.00        | Other categories                               | Transposon-related functions | putative transposase                  |
| bll0932  | -1.6        | 0.45        | Other categories                               | Drug and analog sensitivity  | multidrug resistance protein A        |
| blr3678  | -1.6        | 0.45        | Other categories                               | Other                        | putative oxidoreductase               |
| blr2475  | +1.9        | 0.45        | Regulatory functions                           | -                            | tryptophan-rich sensory protein       |
| bll0933  | -2.0        | 0.45        | Regulatory functions                           | -                            | transcriptional regulatory protein    |
| bll5415  | +2.4        | 0.45        | Translation                                    | Ribosomal proteins           | 50S ribosomal Protein L11             |
| bsl5392  | +1.8        | 0.00        | Translation                                    | Ribosomal proteins           | 50S ribosomal protein L29             |
| bll5377  | +1.8        | 0.00        | Translation                                    | Ribosomal proteins           | 30S ribosomal protein S11             |
| bll5397  | +1.7        | 0.00        | Translation                                    | Ribosomal proteins           | 50S ribosomal protein L2              |
| bll5381  | +1.6        | 0.00        | Translation                                    | Ribosomal proteins           | 50S ribosomal protein L15             |
| bsl5382  | +1.6        | 0.00        | Translation                                    | Ribosomal proteins           | 50S ribosomal protein L30             |
| bsl5391  | +1.5        | 0.00        | Translation                                    | Ribosomal proteins           | 30S ribosomal protein S17             |
| blr7037  | +1.9        | 0.00        | Transport and binding proteins                 | -                            | periplasmic nitrate reductase         |
| bsr7036  | +1.9        | 0.00        | Transport and binding proteins                 | -                            | periplasmic nitrate reductase protein |
| bsr4636  | +1.7        | 0.00        | Transport and binding proteins                 | -                            | putative cation transport regulator   |
| bll6911  | -1.5        | 0.00        | Transport and binding proteins                 | -                            | ABC transporter ATP-binding protein   |

Table S1. *Cont.*

| Locus ID   | Fold Change | q-Value (%) | Functional Level I | Functional Level II            | Functional Level III (Description) |
|------------|-------------|-------------|--------------------|--------------------------------|------------------------------------|
| bsl2070.3n | +1.6        | 0.00        |                    | -                              | hypothetical protein bsl2070.3n    |
| blr1806    | +2.1        | 0.00        | Hypothetical       | No similarity                  | hypothetical protein blr1806       |
| blr0678    | +2.0        | 0.00        | Hypothetical       | Conserved hypothetical protein | heat shock protein 70              |
| bll1877    | +1.9        | 0.45        | Hypothetical       | No similarity                  | hypothetical protein bll1877       |
| bll1848    | +1.9        | 0.00        | Hypothetical       | No similarity                  | hypothetical protein bll1848       |
| bll6880    | +1.9        | 0.00        | Hypothetical       | No similarity                  | hypothetical protein bll6880       |
| blr4641    | +1.9        | 0.00        | Hypothetical       | No similarity                  | hypothetical protein blr4641       |
| bsr6521    | +1.8        | 0.00        | Hypothetical       | Conserved hypothetical protein | hypothetical protein bsr6521       |
| blr7345    | +1.8        | 0.00        | Hypothetical       | No similarity                  | hypothetical protein blr7345       |
| bll1862    | +1.8        | 0.45        | Hypothetical       | No similarity                  | hypothetical protein bll1862       |
| bsl4593    | +1.8        | 0.00        | Hypothetical       | No similarity                  | hypothetical protein bsl4593       |
| bsr3925    | +1.8        | 0.00        | Hypothetical       | No similarity                  | hypothetical protein bsr3925       |
| bsl4650    | +1.7        | 0.00        | Hypothetical       | No similarity                  | hypothetical protein bsl4650       |
| bsr5316    | +1.7        | 0.00        | Hypothetical       | Conserved hypothetical protein | hypothetical protein bsr5316       |
| bsl1006    | +1.6        | 0.00        | Hypothetical       | No similarity                  | hypothetical protein bsl1006       |
| bsr6520    | +1.6        | 0.45        | Hypothetical       | Conserved hypothetical protein | hypothetical protein bsr6520       |
| bsl1845    | +1.6        | 0.45        | Hypothetical       | No similarity                  | hypothetical protein bsl1845       |
| bsr4821    | +1.6        | 0.00        | Hypothetical       | No similarity                  | hypothetical protein bsr4821       |
| bll7982    | +1.6        | 0.00        | Hypothetical       | Conserved hypothetical protein | hypothetical protein bll7982       |
| blr2140    | +1.6        | 0.00        | Hypothetical       | Conserved hypothetical protein | hypothetical protein blr2140       |
| blr4638    | +1.6        | 0.00        | Hypothetical       | Conserved hypothetical protein | hypothetical protein blr4638       |
| bsr4956    | +1.6        | 0.00        | Hypothetical       | No similarity                  | hypothetical protein bsr4956       |
| bll7221    | +1.6        | 0.00        | Hypothetical       | No similarity                  | hypothetical protein bll7221       |
| bll7990    | +1.6        | 0.45        | Hypothetical       | No similarity                  | hypothetical protein bll7990       |
| blr2456    | +1.6        | 0.00        | Hypothetical       | Conserved hypothetical protein | hypothetical protein blr2456       |
| blr4646    | +1.5        | 0.45        | Hypothetical       | Conserved hypothetical protein | hypothetical protein blr4646       |
| bll2471    | +1.5        | 0.00        | Hypothetical       | Conserved hypothetical protein | hypothetical protein bll2471       |

Table S1. *Cont.*

| Locus ID | Fold Change | q-Value (%) | Functional Level I | Functional Level II            | Functional Level III (Description) |
|----------|-------------|-------------|--------------------|--------------------------------|------------------------------------|
| blr6074  | +1.5        | 0.00        | Hypothetical       | Conserved hypothetical protein | hypothetical protein blr6074       |
| bsr5273  | +1.5        | 0.00        | Hypothetical       | No similarity                  | hypothetical protein bsr5273       |
| blr4240  | +1.5        | 0.00        | Hypothetical       | Conserved hypothetical protein | hypothetical protein blr4240       |
| blr1854  | +1.5        | 0.45        | Hypothetical       | Conserved hypothetical protein | hypothetical protein blr1854       |
| bsr7720  | +1.5        | 0.45        | Hypothetical       | No similarity                  | hypothetical protein bsr7720       |
| blr7860  | -3.3        | 0.00        | Hypothetical       | Conserved hypothetical protein | hypothetical protein blr7860       |
| blr4417  | -1.8        | 0.45        | Hypothetical       | No similarity                  | hypothetical protein blr4417       |
| blI1406  | -1.6        | 0.00        | Hypothetical       | Conserved hypothetical protein | hypothetical protein blI1406       |
